# Supplementary material for: A systematic review and meta-analysis to revise the Fenton growth chart for preterm infants
Source: Springer Nature journal article supplement (doi:10.1186/1471-2431-13-59), 2013-04-20

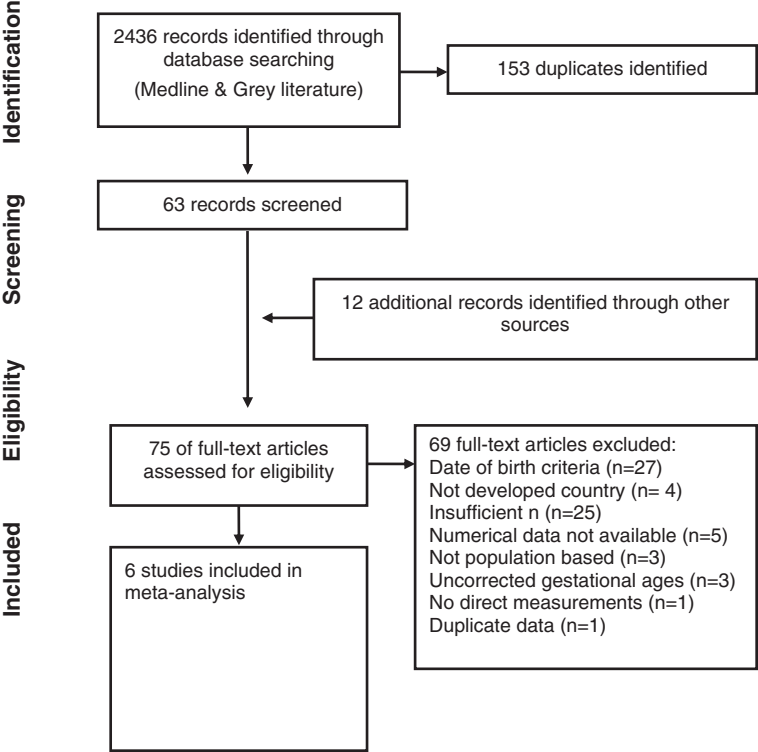

Supplement: 12887_2012_783_MOESM4_ESM.pdf [file 12887_2012_783_MOESM4_ESM.pdf]
